# Supplementary material for: GATA2 mitotic bookmarking is required for definitive haematopoiesis
Source: PubMed Central journal article supplement (PMC10425459; doi:10.1038/s41467-023-40391-x), 2023-08-14

## GATA2 mitotic bookmarking is required for definitive haematopoiesis

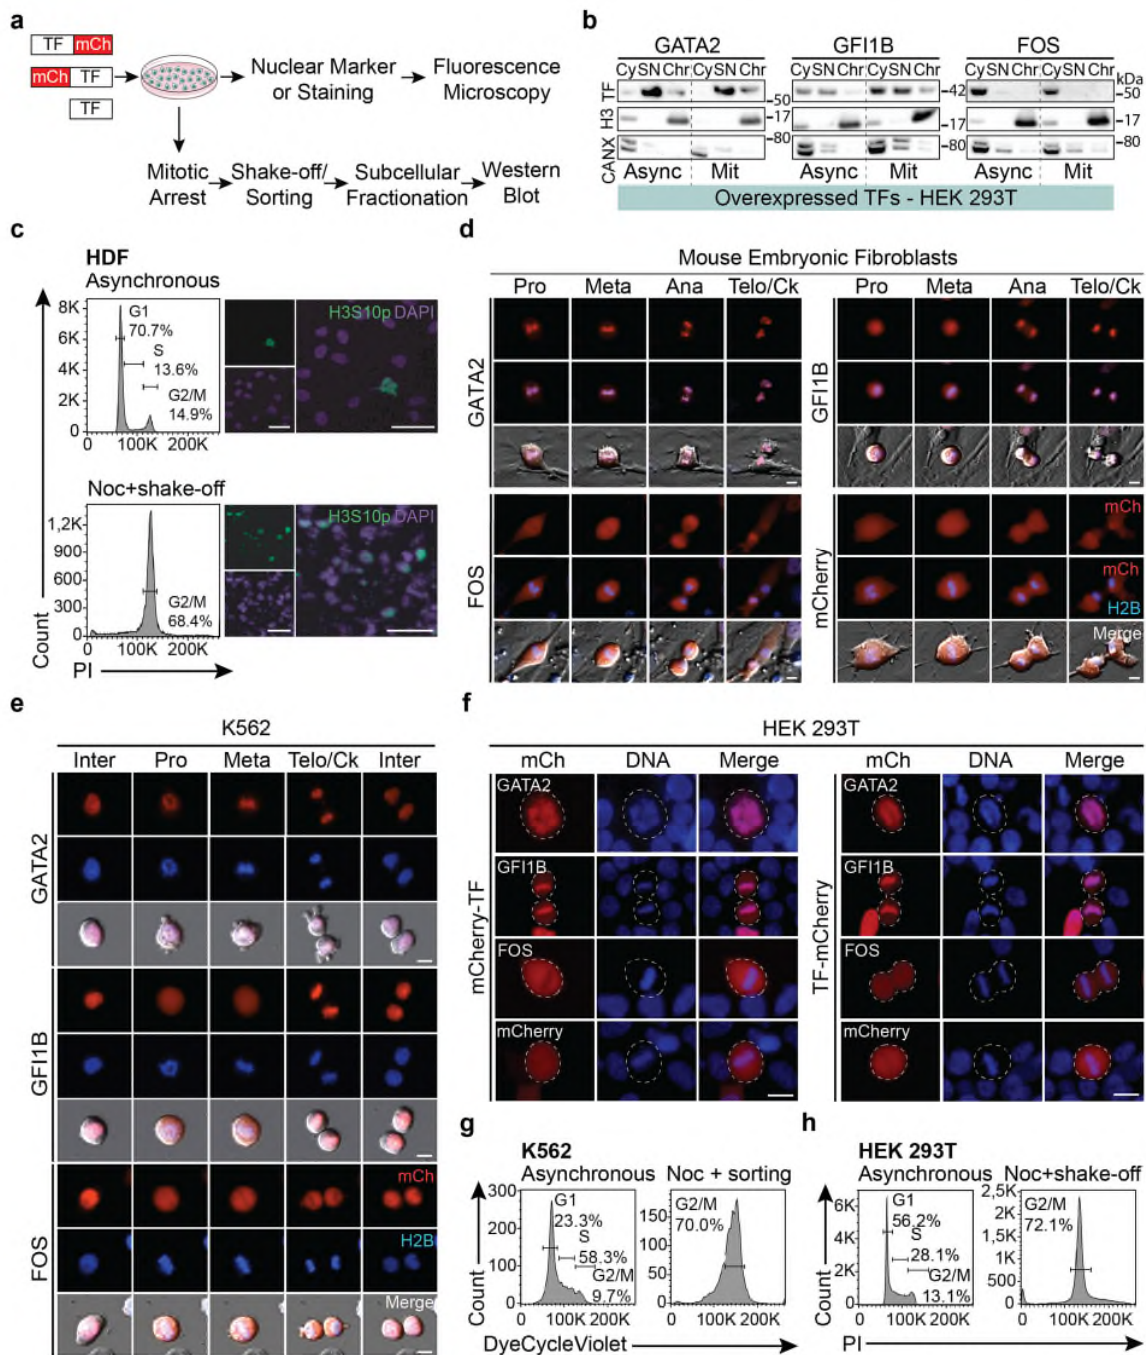

**Supplementary Fig. 1. GATA2, GFI1B and FOS chromatin retention in mitotic cells. a,** Strategy to assess mitotic chromatin retention. Individual transcription factors (TFs) were fused to mCherry (mCh) fluorescent protein upstream or downstream TF sequence and mouse embryonic fibroblasts, human dermal fibroblasts (HDFs), K562 or HEK 293T cells analysed by live-cell

imaging. In parallel, HDFs, K562 or HEK 293T cells were arrested in pro-metaphase with nocodazole followed by subcellular protein fractionation and protein levels were detected by western blot. **b**, TF expression in cytoplasmic (Cy), soluble nucleus (SN) and chromatin-bound (Chr) protein fractions of asynchronous (Async) and mitotic (Mit) HEK 293T cells, after overexpression of the indicated TF. Calnexin (CANX) and histone 3 (H3) represent loading controls. Western blots were performed once. kDA, kilodaltons. **c**, Flow cytometry cell cycle analysis (left) and immunofluorescence (right) for the mitotic marker histone H3 phosphorylated at serine 10 (H3S10p) in asynchronous and mitotic HDFs after nocodazole (Noc) treatment and mitotic shake-off. Nuclei were stained with DAPI. Scale bar = 100  $\mu$ m. Experiment was performed once. **d**, Live-cell images of mouse embryonic fibroblasts overexpressing mCh-TF fusion proteins during mitosis (Pro – prophase, Meta – metaphase, Telo/Ck – Telophase/Cytokinesis). DNA content is represented by histone 2B (H2B)-mTurquoise signal. Scale bar = 10  $\mu$ m. Mitotic events: n(GATA2)=31, n(FOS)=36, n(GFI1B)=31, n(mCherry)=19. **e**, Live-cell images of K562 cells overexpressing mCh-GATA2 or mCh-GFI1B fusions during interphase (Inter) and mitosis. Mitotic events: n(GATA2)=28, n(FOS)=35, n(GFI1B)=74. Scale bar = 10  $\mu$ m. **f**, Live-cell images of HEK 293T cells overexpressing mCherry fused to the N-terminal (mCherry-TF) or C-terminal (TF-mCherry) of the 3 TFs during mitosis. Hoechst marks DNA. Scale bar = 10  $\mu$ m. **g**, Flow cytometry cell cycle analysis of asynchronous and nocodazole (Noc) treated K562 cells with the permeable DNA stain Vybrant DyeCycle Violet. For western blot quantifications, live mitotic cells were FACS sorted using the indicated G2/M gate. **h**, Cell cycle analysis of asynchronous and nocodazole (Noc) arrested HEK 293T cells after mitotic shake-off. Experiment was performed once. PI – propidium iodide.

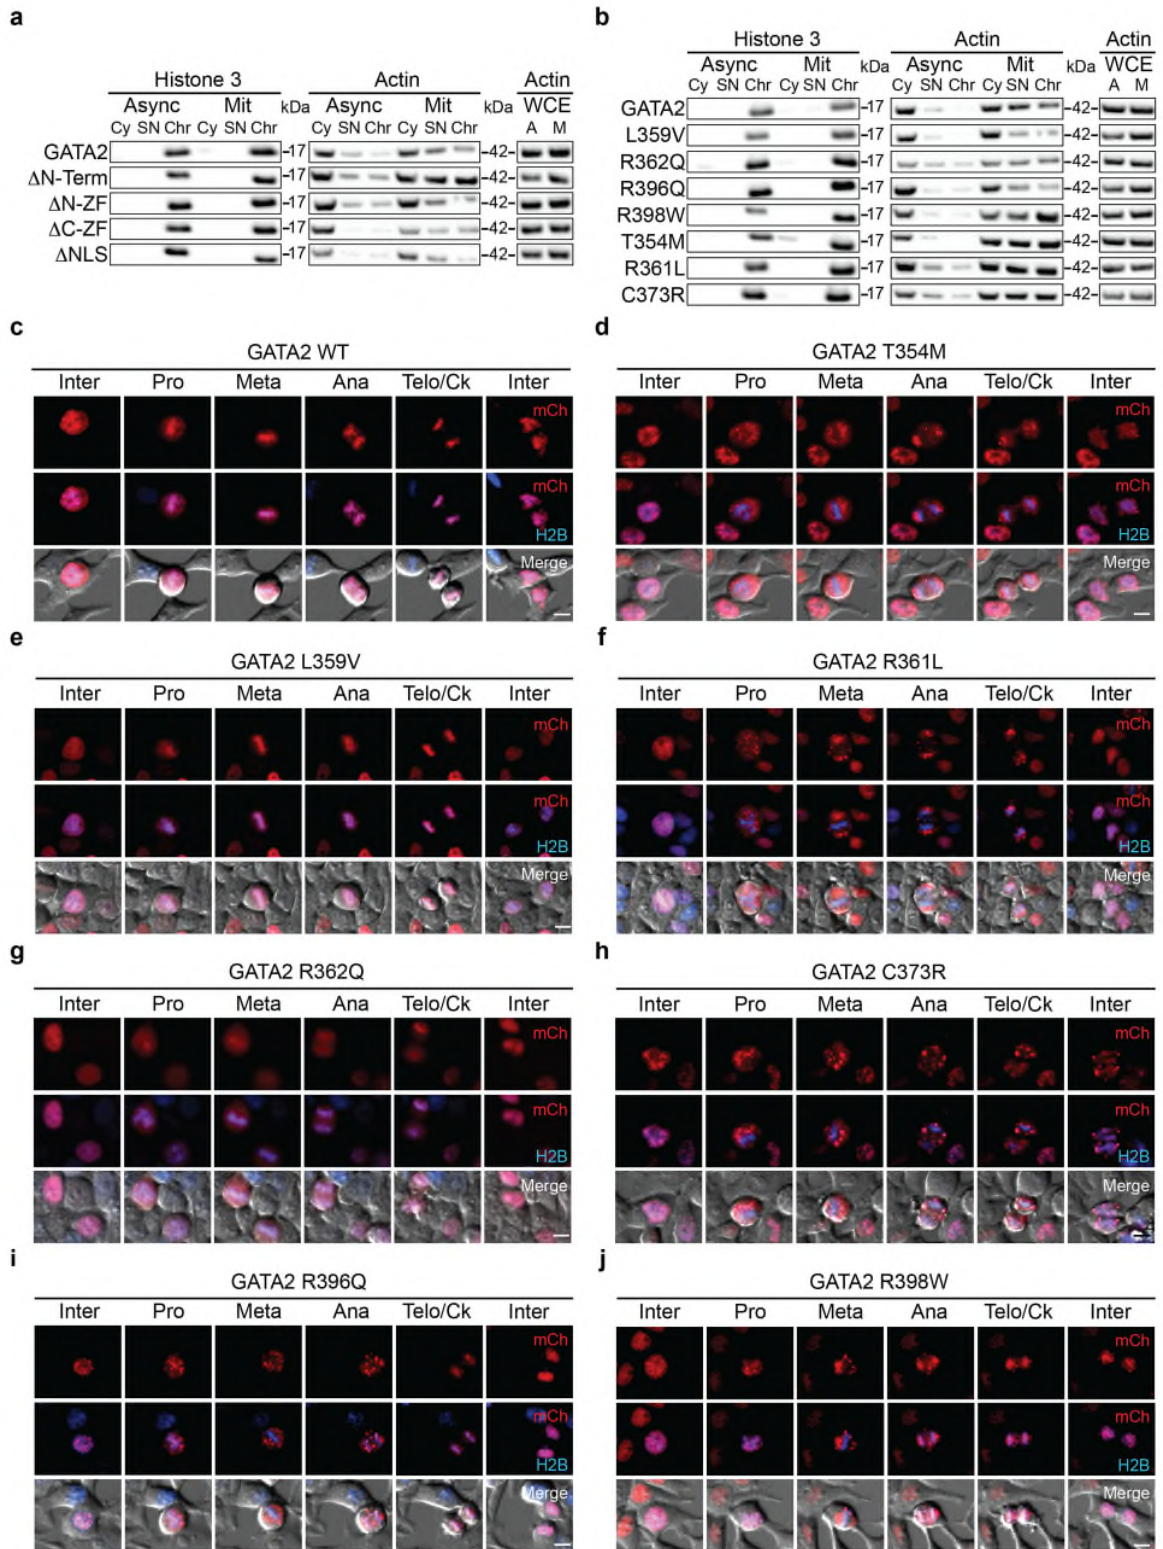

**Supplementary Fig. 2. Chromatin retention of GATA2 is reduced by mutations in the C-terminal zinc finger (C-ZF).** a, b, Western blot analysis of actin and histone 3 loading controls

for mCherry-GATA2 deletion constructs (**a**) and mutant proteins (**b**) in whole-cell extracts (WCE) and protein fractionations of asynchronous (A, Async) and mitotic (M, Mit) HEK 293T cells. Bands were acquired using the same exposure times for asynchronous and mitotic cells, depending on the antibody and protein isolation method. Western blots were repeated at least three times. Cy, cytoplasmic protein fraction. SN, soluble nucleus protein fraction. Chr, chromatin-bound protein fraction. kDA, kilodaltons. **c-j**, Live-cell images of HEK 293T cells overexpressing mCherry (mCh)-GATA2 (red) wild-type (WT) (**c**) and GATA2 proteins mutated in C-ZF in positions T354M (**d**), L359V (**e**), R361L (**f**), R362Q (**g**), C373R (**h**), R396Q (**i**) and R398W (**j**) in interphase (Inter) and mitosis (Pro – prophase, Meta – metaphase, Telo/Ck – Telophase/Cytokinesis). The first letter represents the wild-type amino acid, followed by the position and the replaced amino acid. DNA is marked by histone 2B (H2B)-mTurquoise (blue). Scale bars = 10  $\mu$ m. Mitotic events: n(GATA2)=219, n(T354M)=724, n(L359V)=78, n(R361L)=165, n(R362Q)=18, n(C373R)=360, n(R396Q)=151, n(R398W)=147.



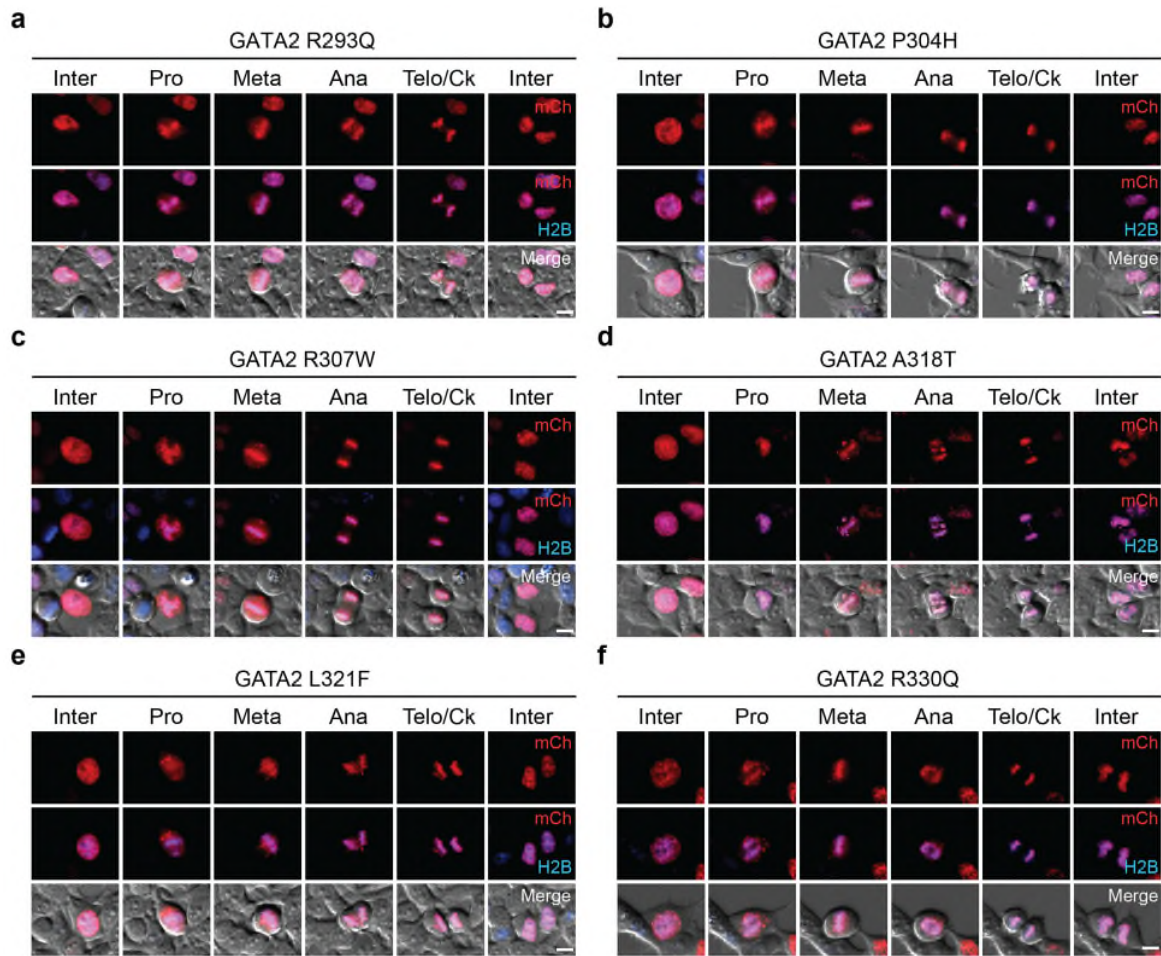

**Supplementary Fig. 3. Chromatin retention of GATA2 is not impacted by mutations in the N-terminal zinc finger (N-ZF).** **a-f**, Live-cell images of HEK 293T cells overexpressing mCherry (mCh)-GATA2 (red) proteins mutated in N-ZF in positions R293Q (**a**), P304H (**b**), R307W (**c**), A318T (**d**), L321F (**e**), R330Q (**f**) in interphase (Inter) and mitosis (Pro – prophase, Meta – metaphase, Telo/Ck – Telophase/Cytokinesis). The first letter represents the wild-type amino acid, followed by the position and the replaced amino acid. DNA is marked by histone 2B (H2B)-mTurquoise (blue). Scale bars = 10  $\mu$ m. Mitotic events: n(R293Q)=73, n(P304H)=151, n(R307W)=172, n(A318T)=296, n(L321F)=290, n(R330Q)=92.

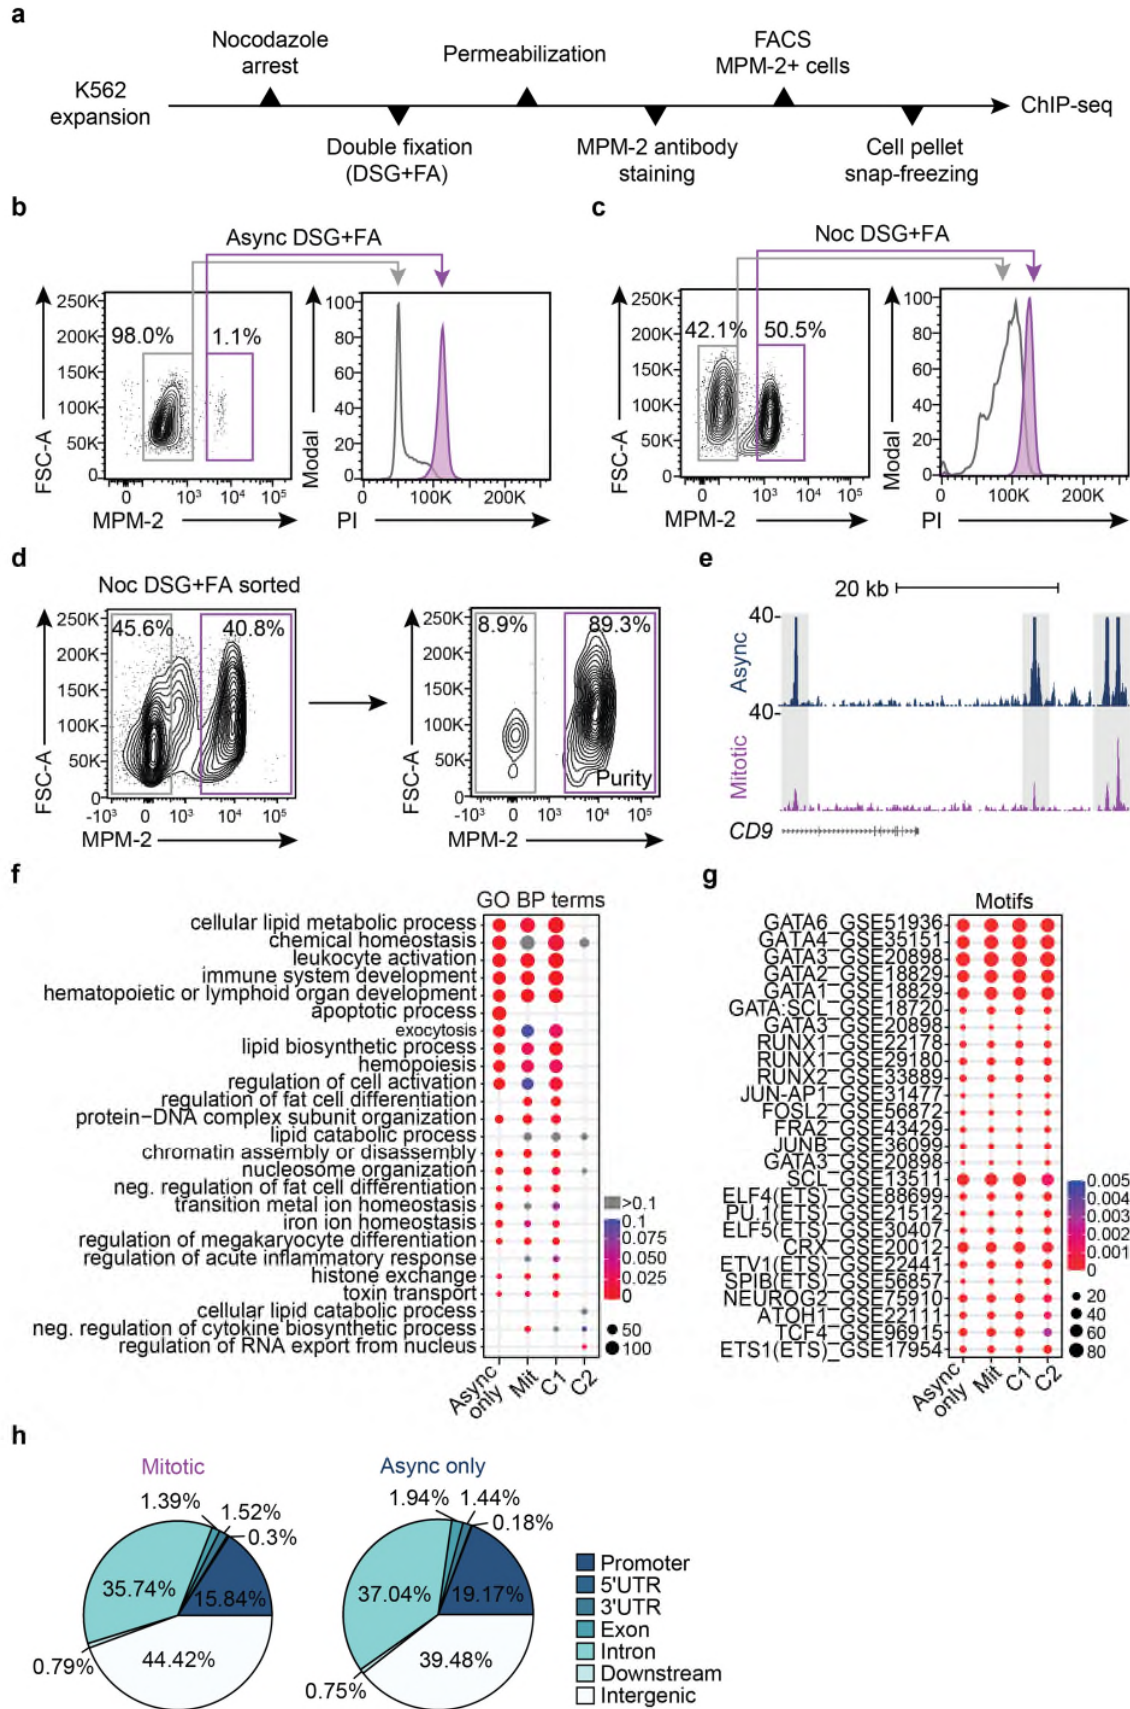

**Supplementary Fig. 4. Sorting strategy for Chromatin Immunoprecipitation followed by sequencing (ChIP-seq) of mitotic K562 cells and complementary analyses.** **a**, Outline of mitotic K562 fixation and FACS sorting steps. K562 were arrested with 0.2  $\mu\text{g}/\text{mL}$  nocodazole for 12-14h and fixed with 2mM Di(N-succinimidyl) glutarate (DSG) before fixation with 1% formaldehyde (FA). After that, cells were permeabilized and stained with anti-phospho-Ser/Thr-Pro MPM-2 primary antibody and anti-mouse AF647 secondary antibody. MPM-2 antibody recognizes several phosphorylated proteins during mitosis. Cells positive for MPM-2 were FACS sorted, washed and cell pellets were snap-frozen for ChIP. **b**, Quantification of interphasic and mitotic K562 cells after double fixation. Mitotic cells were identified in the 4N peak according to propidium iodide (PI) staining. **c**, Quantification of interphasic and mitotic K562 cells after nocodazole treatment and double fixation. **d**, Gating strategy to sort MPM-2 positive nocodazole treated K562 cells after double fixation. Mitotic cell purity after sorting is shown. **e**, Gene tracks for GATA2 binding sites at *CD9 locus*. Bookmarked sites are highlighted in grey. **f**, Gene Ontology (GO) biological processes (BP) for the top 1,000 gene-related peaks in non-bookmarked genes in asynchronous cells (Async only), mitotic (Mit) and mitotic clusters 1 (C1) and 2 (C2). Categories that contain more than 5 peaks per category are displayed. Coloured scale represents the adjusted *p*-value and the circle size the number of peaks per group. **g**, Motif discovery analysis for GATA2 target sites per group of peaks. Coloured scale represents the adjusted *p*-value and the circle size the percentage of peaks containing a particular motif. **h**, Gene body distribution of Mit and Async only GATA2 binding sites.



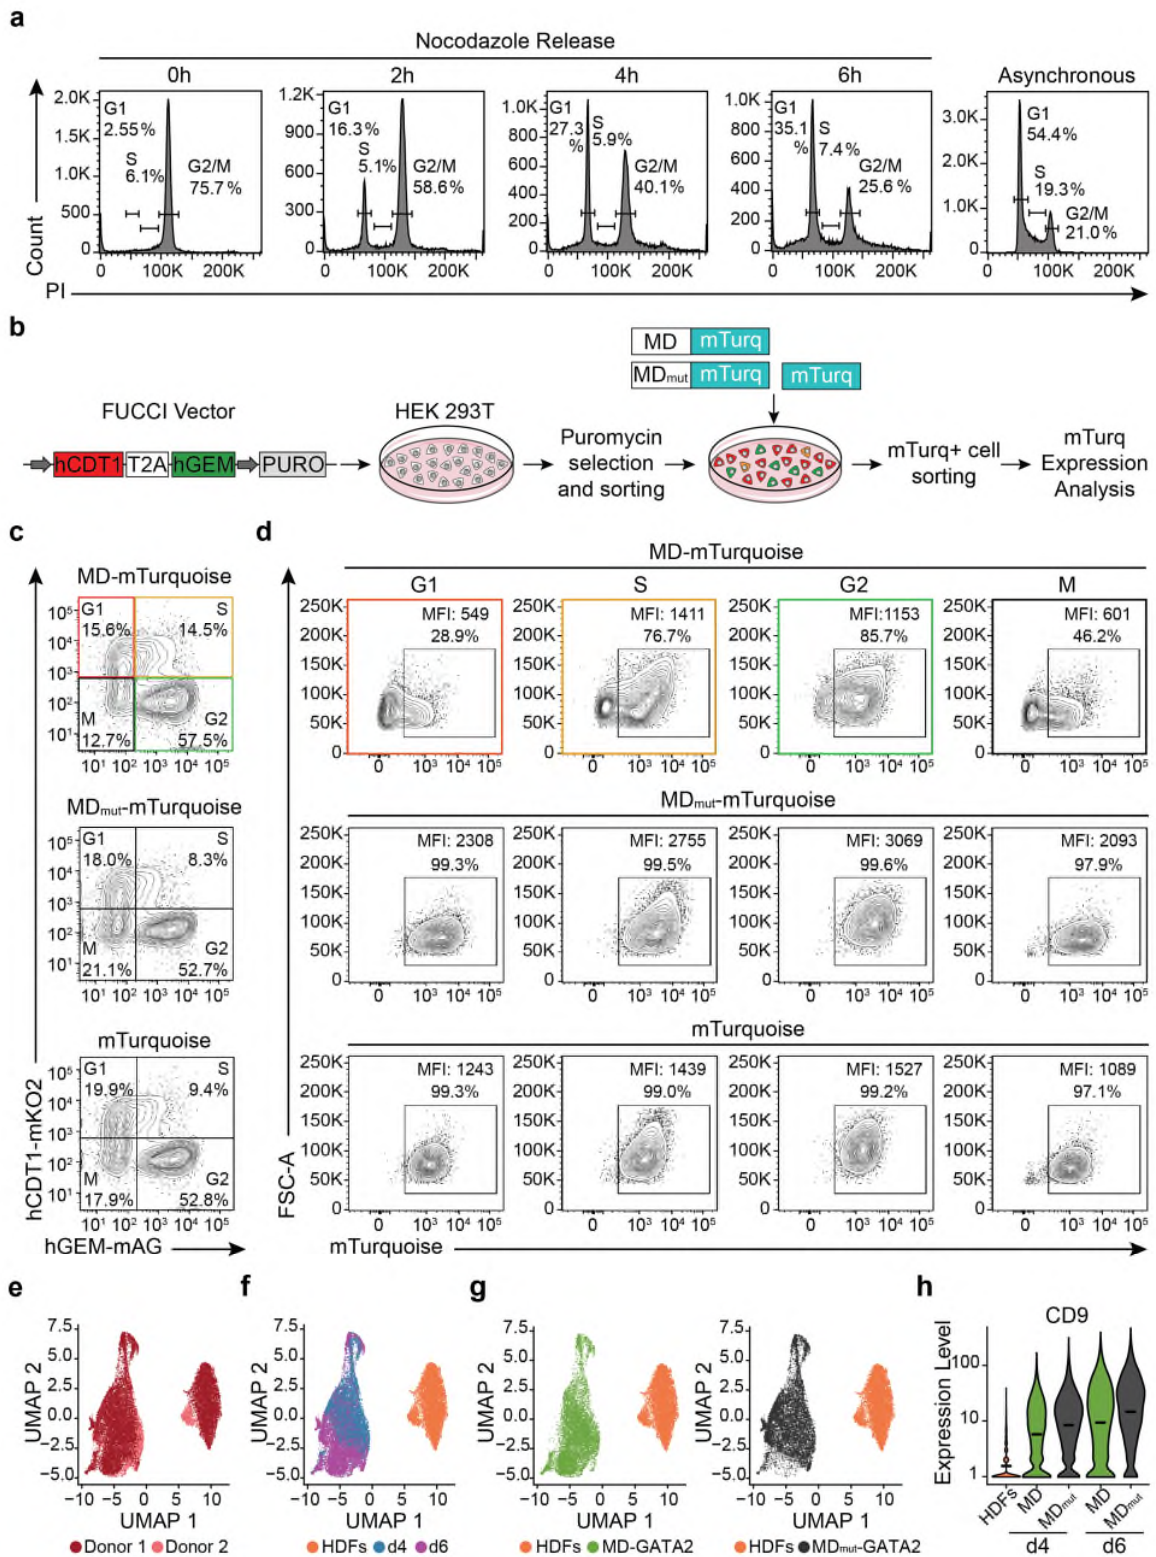



nocodazole treated HEK 293T cells before (0h) and 2, 4 and 6 hours (h) after release from nocodazole arrest. PI – propidium iodide. Percentage of cells in G1, S and G2/M phases of the cell cycle are indicated. **b**, Experimental strategy to assess mTurquoise (mTurq) protein degradation when fused to the MD domain or a mutated non-functional version (MD<sub>mut</sub>). HEK 293T cell line stably expressing a fluorescent ubiquitination-based cell cycle indicator (FUCCI) vector was generated by transduction with a FUCCI lentiviral vector, encoding a puromycin (Puro) resistance gene. After puromycin selection and purification of GFP<sup>+</sup> cells by FACS, cells were transduced with lentiviral vectors encoding MD-mTurquoise, MD<sub>mut</sub>-mTurquoise or mTurquoise. mTurquoise<sup>+</sup> cells were FACS sorted, plated and mTurquoise expression was measured 48 hours later by flow cytometry. hCDT1 – human CDT1 fused to mKusabira-Orange2 (mKO2). hGEM – human Geminin fused to mAzamiGreen (mAG). **c**, Flow cytometry plots showing the separation of cell cycle populations: interphase – G1 (red – mKO2+mAG<sup>-</sup>), S (yellow – mKO2+mAG<sup>+</sup>) and G2 (green – mKO2-mAG<sup>+</sup>), and mitosis – M (black – mKO2-mAG<sup>-</sup>) of cells expressing MD/MD<sub>mut</sub>-mTurquoise or mTurquoise alone. **d**, Flow cytometry plots showing mTurquoise expression gated within each cell cycle phase population. MFI – mean fluorescence intensity. **e-g**, Uniform Manifold Approximation and Projection (UMAP) analysis of 32,773 single transcriptomes of FACS sorted, live (Dapi<sup>-</sup>) human dermal fibroblasts (HDFs) and HDFs undergoing hemogenic reprogramming with overexpression of GFI1B, FOS and MD-GATA2 or GFI1B, FOS and MD<sub>mut</sub>-GATA2 from two donors. **(e)** shows single cells coloured by donor (Donor 1 and Donor 2) **(f)** highlights untransduced HDFs and reprogrammed cells at day (d) 4 and d6 and **(g)** shows transduced cells with either MD-GATA2 (left) or MD<sub>mut</sub>-GATA2 (right). **h**, Expression levels of the *CD9* gene in untransduced HDFs and in MD-GATA2 or MD<sub>mut</sub>-GATA2 transduced cells at d4 and d6 of hemogenic reprogramming. Mean is represented.

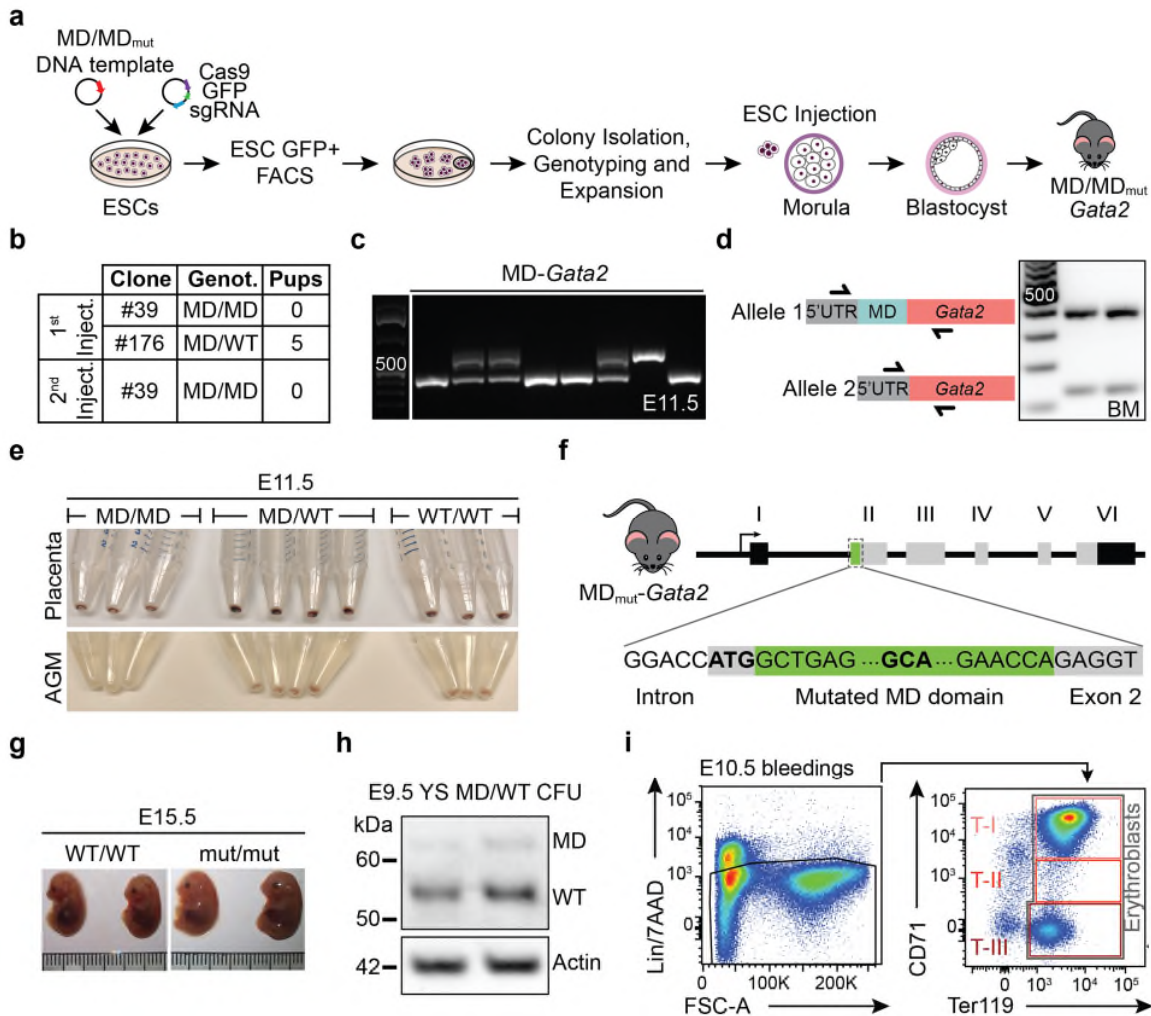

**Supplementary Fig. 6. Characterisation of MD- and MD<sub>mut</sub>-Gata2 mouse models.** **a**, Strategy to generate a mouse model to assess the role of mitotic bookmarking by GATA2 *in vivo*. The mitotic degradation (MD) domain of cyclin B1 and a mutated non-functional domain (MD<sub>mut</sub>) template sequences were delivered in a pMX plasmid to mouse embryonic stem cells (ESCs) together with a pX458-GFP vector containing a single guide (sg) RNA for *Gata2* start codon region. GFP<sup>+</sup> cells were FACS sorted, and individual clones were isolated, genotyped, expanded and injected into mouse morulae to generate both MD-Gata2 and MD<sub>mut</sub>-Gata2 models. **b**, Number of pups obtained after two independent morula injections with homozygous or heterozygous ESC clones for the MD insert. **c**, Genotyping of embryonic day (E) 11.5 embryos after crossing heterozygous MD-Gata2 mice. A 630 base pairs band indicates the presence of the

insert while a lower band of 400 bps represents the wild-type (WT) *Gata2* allele. Genotyping was performed in individual embryos or adult mice before each experiment. **d**, Gene expression of the MD and *Gata2* WT alleles. mRNA of sorted LSK cells from bone marrow (BM) heterozygous mice were isolated, reverse transcribed and amplified by PCR. The stronger, heavier band corresponds to the MD sequence. Experiment was performed once with cells from 3 different adult heterozygous mice. Representative results for two mice are shown. **e**, Representative pictures of placenta pellets and caudal regions isolated from single E11.5 embryos after tissue dissociation. **f**, Scheme showing the insertion of the MD<sub>mut</sub> domain after the ATG of the *Gata2* gene in exon 2. **g**, Representative images of MD<sub>mut</sub>-*Gata2* embryos at E15.5. Scale bar = 1 mm. **h**, Western blot analysis of heterozygous MD-GATA2 E9.5 yolk sac-derived hematopoietic colonies after 6 days of culture. Bands corresponding to MD-GATA2 (MD) and wild-type (WT) proteins are shown. Experiment was performed once with cells from 4 different embryos. Representative results for two embryos are shown. kDa, kilodaltons. **i**, Representative flow cytometry plots of erythroblast quantification after whole embryo bleeding to assess erythroid output. MD-*Gata2* embryonic blood was stained with lineage antibodies (B220/CD3ε/Mac1/Gr1) and the erythroblast markers CD71 and Ter119. Live lineage negative cells (Lin-7AAD-) were gated into three types of erythroblasts from immature to more mature red blood cells (Type I-III) according to the expression of CD71 and Ter119. The grey gate includes all erythroblasts.

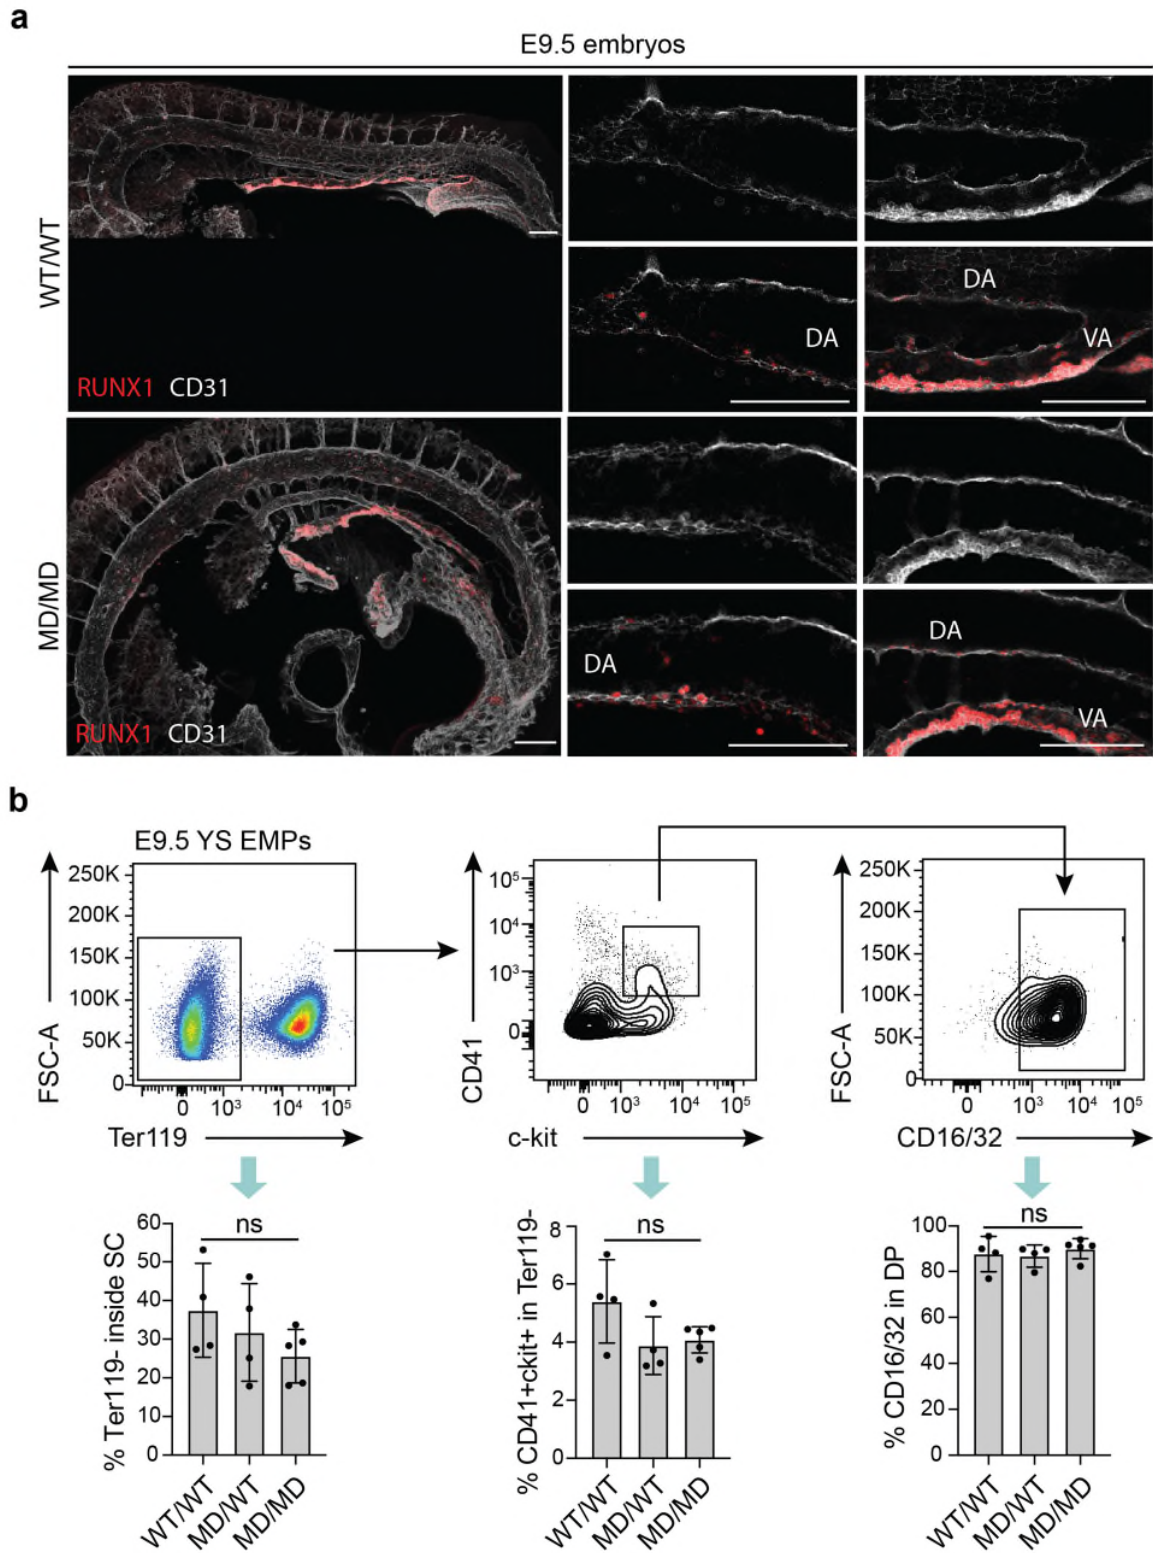

**Supplementary Fig. 7. Haematopoiesis is not impaired in MD-*Gata2* homozygous embryos at embryonic day 9.5. a, Immunohistochemistry images of whole mounted E9.5 WT and MD**



homozygous embryos showing vasculature expressing RUNX1 (red) and CD31 (white), highlighting the dorsal aorta (DA) and vitelline arteries (VA). Scale bars = 100  $\mu$ m. **b**, E9.5 yolk sac (YS) erythro-myeloid progenitor (EMPs) staining. Yolk sacs from E9.5 embryos were isolated, dissociated and stained with Ter119, c-kit, FITC-CD41 and CD16/32. EMPs were defined as Ter119-CD41+c-kit+CD16/32+. Representative plots with gating strategy (left) and percentage of each respective cell population (right) are shown (n=4). SC – single cells. DP – double positive. Mean $\pm$ SD is represented. Statistical significance was analysed by one-way ANOVA followed by Bonferroni's multiple comparison test. ns – nonsignificant.

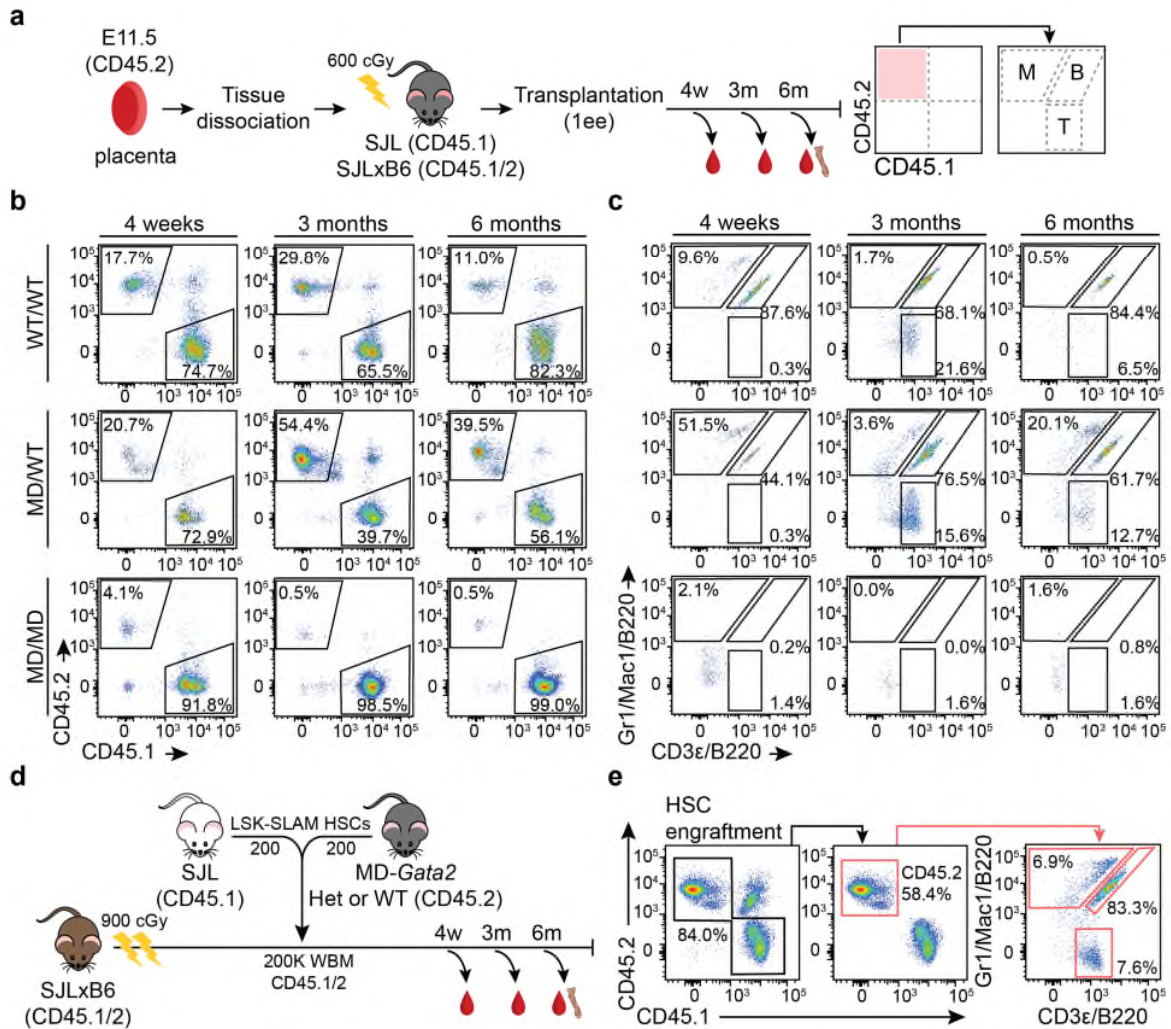

**Supplementary Fig. 8. Embryonic and adult transplantation strategies to assess the role of**

**GATA2 at mitosis-to-G1 transition for HSPC generation and maintenance. a, E11.5 placentas**

were isolated, dissociated and transplanted as one embryo equivalent (ee) into sub-lethally

irradiated B6.SJL (CD45.1) or C57BL/6JxB6.SJL (CD45.1/2) mice. Mice were bled 4 weeks (w),

3 months (m), and 6 months after transplantation to assess donor engraftment (CD45.2+) and

contribution to myeloid (M), B-cell (B) and T-cell (T) lineages. Hosts' bone marrow cells from

the left leg and ilium bones were isolated at the experimental end-point of 6 months and analysed

in a similar manner. **b, Representative flow cytometry plots with the gating strategy to evaluate**

donor chimerism (CD45.2+). Only mice with donor chimerism above the 1% threshold were

considered in this analysis. **c, Gating strategy for assessing the percentage of myeloid**

(Gr1+Mac1+), B- (B220+) and T- (CD3ε+) donor-derived cells. **d**, Competitive transplantation strategy to address function of adult bone marrow HSCs. Two hundred Lineage<sup>-</sup>Sca-1<sup>+</sup>Kit<sup>+</sup>CD150<sup>+</sup>CD48<sup>-</sup> LSK-SLAM HSCs from a competitor CD45.1 SLJ mouse or from MD/WT or WT/WT MD-*Gata2* mice were FACS purified, mixed 1:1 and injected into lethally irradiated CD45.1/2 hosts, together with 200,000 support whole bone marrow (WBM) cells. Blood was collected for analysis 4w, 3m and 6m after transplantation to assess donor engraftment (CD45.2+) and contribution to myeloid, B-cell and T-cell lineages. Recipients' bone marrow was analysed at the experimental end-point of 6 months. **e**, Representative gating strategy to evaluate donor chimerism (CD45.2+) and for assessing the percentage of myeloid (Gr1+Mac1+), B- (B220+) and T- (CD3ε+) donor-derived cells.

## Western Blots and Gels

### Supplementary Figure 1b

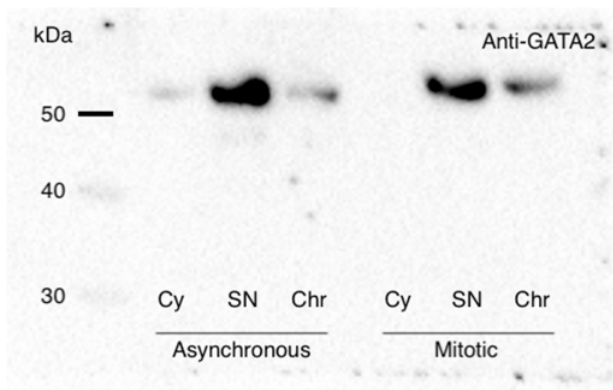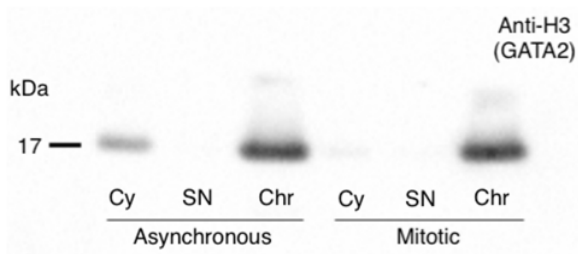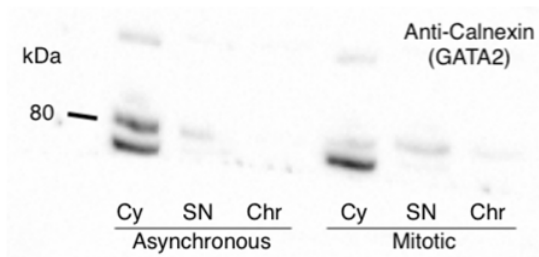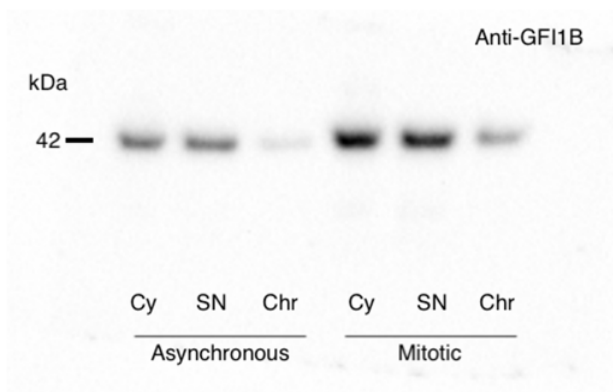



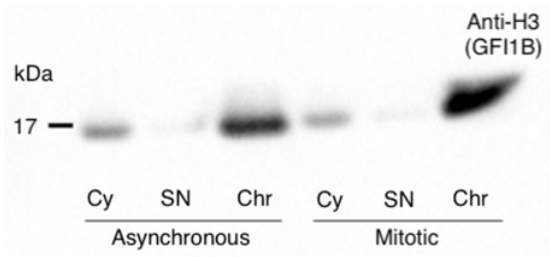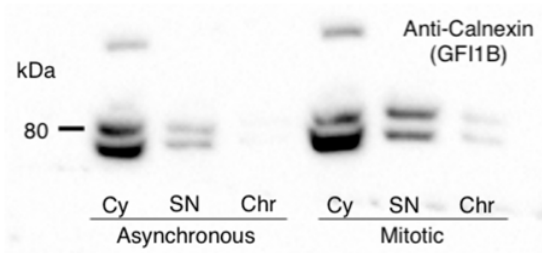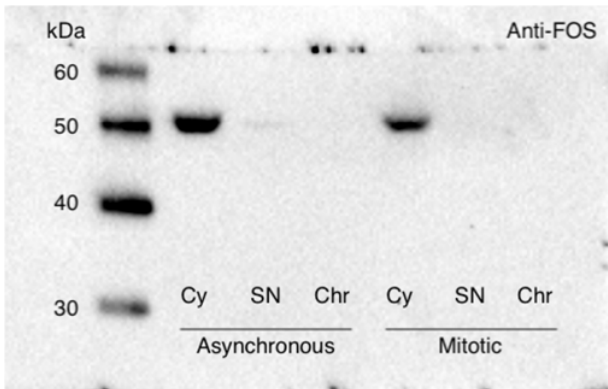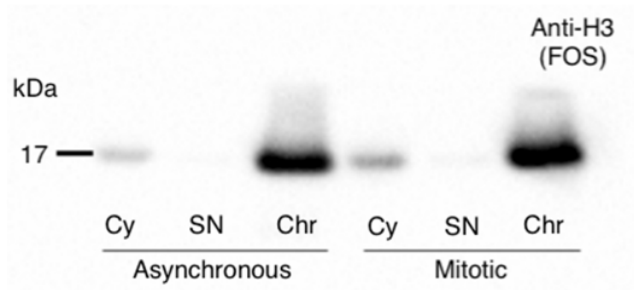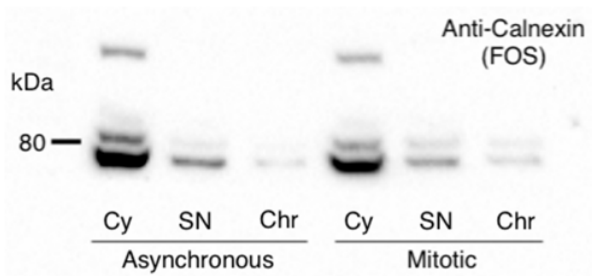

Supplementary Figure 2a

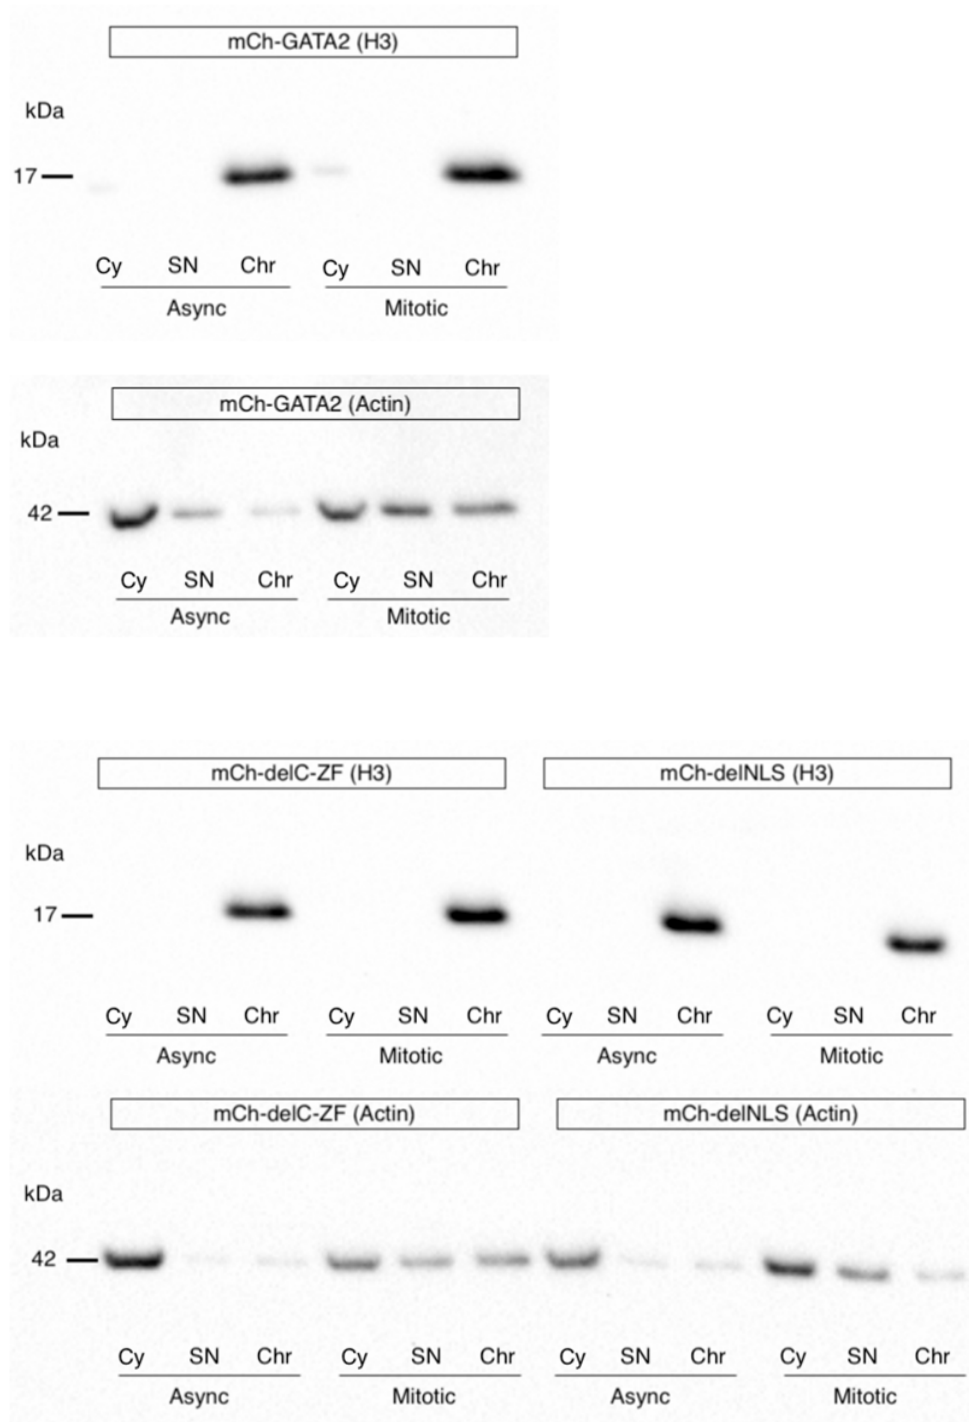



Supplementary Figure 2b

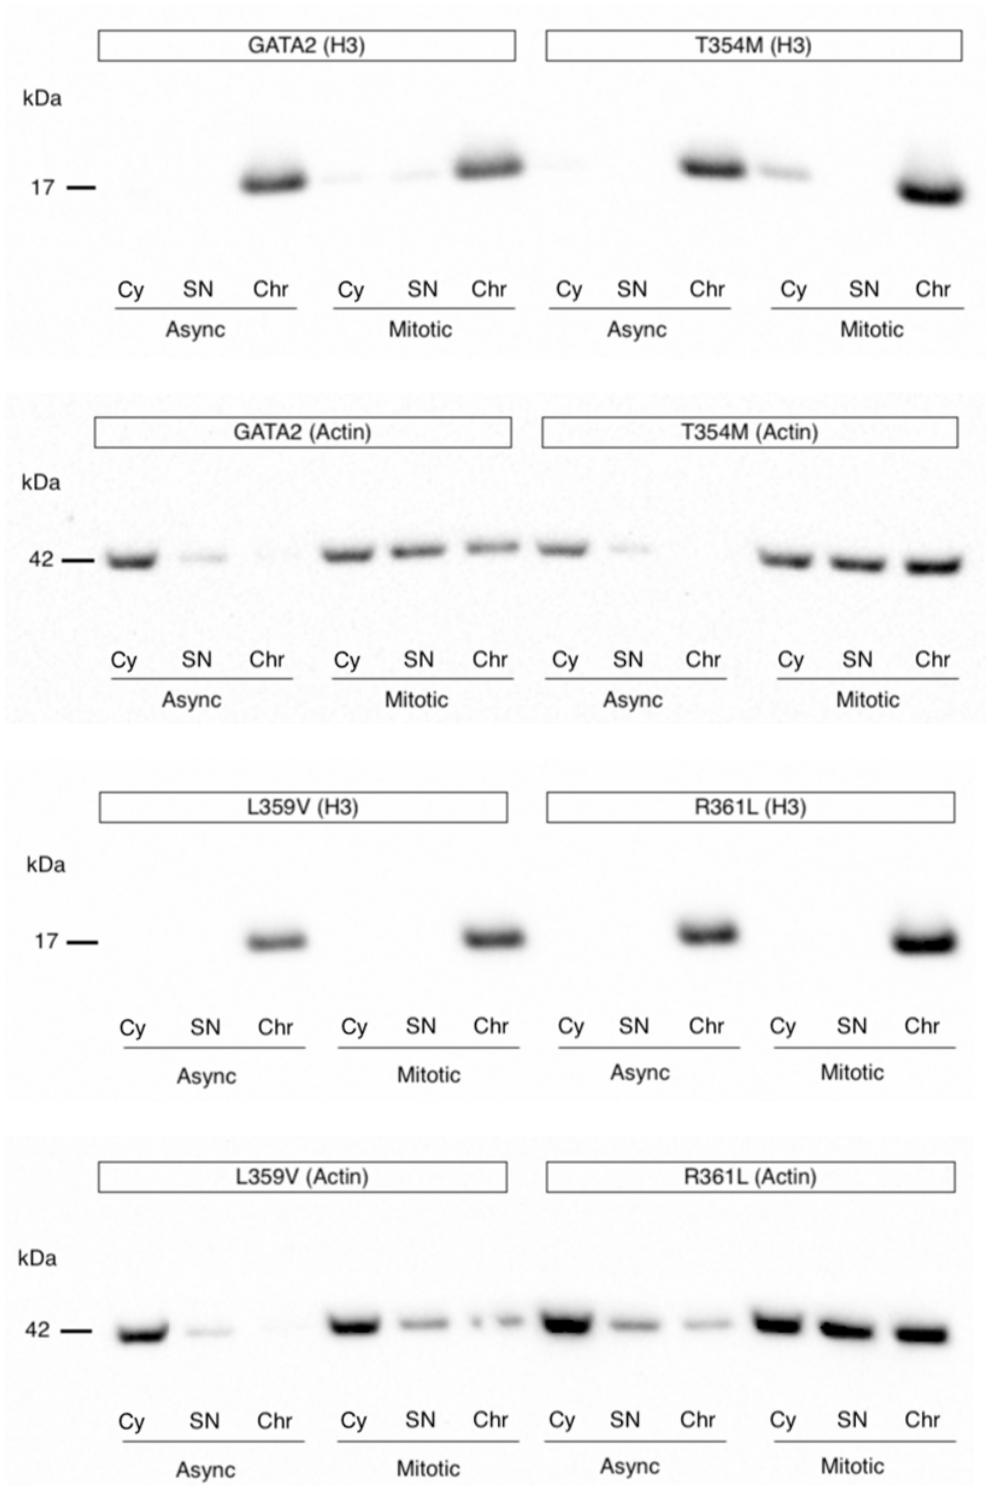



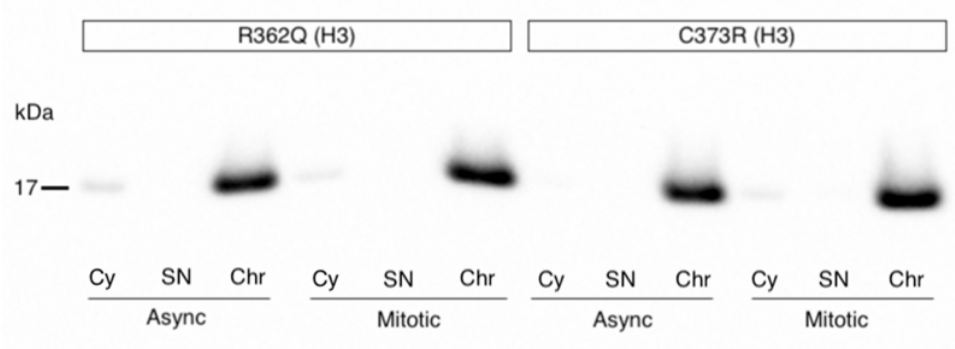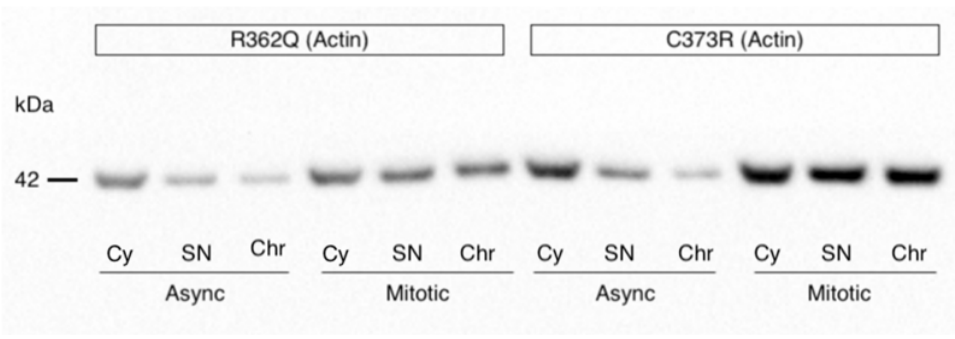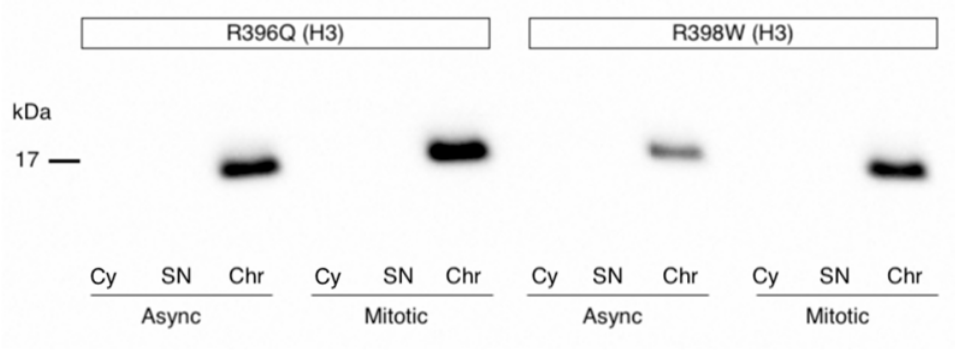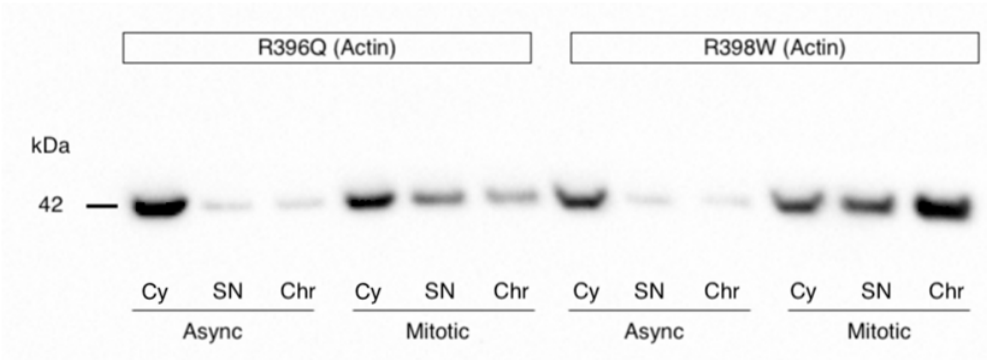

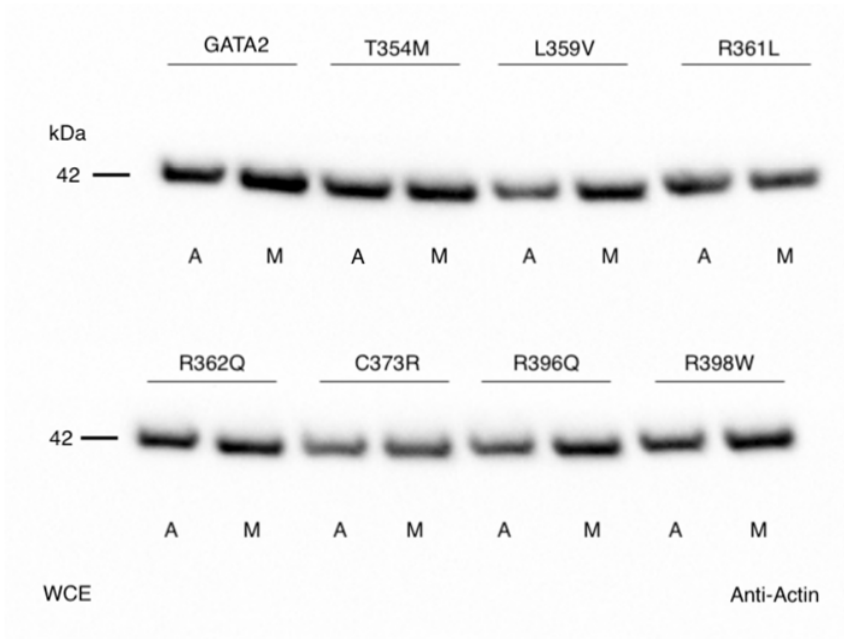

Supplementary Figure 6c

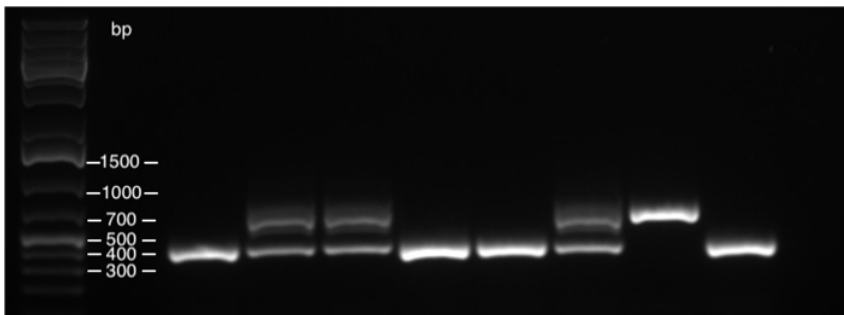

Supplementary Figure 6d

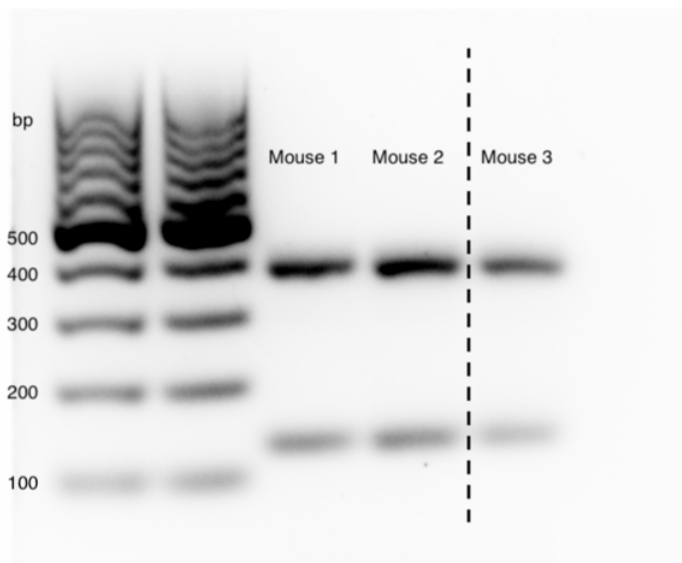

**Supplementary Figure 6h**

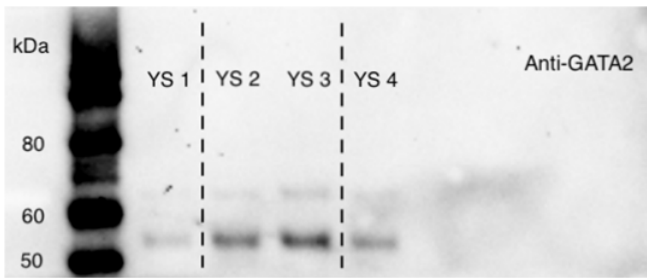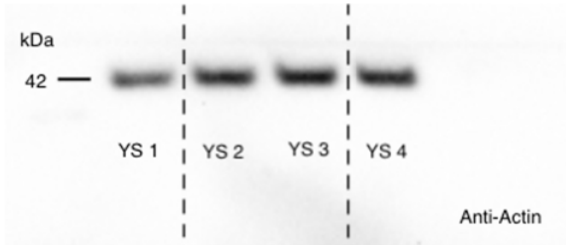

Supplement: 41467_2023_40391_MOESM1_ESM.pdf [file 41467_2023_40391_MOESM1_ESM.pdf]
